# Supplementary material for: Bioinspired modified graphene oxide/polyurethane composites with rapid self-healing performance and excellent mechanical properties
Source: Royal Society of Chemistry journal article supplement (doi:10.1039/d1ra00944c), 2021-01-01
Supplement: d1ra00944c4.pdf [file d1ra00944c4.pdf]

### **Supporting Information**

**Movie S1.** The tensile test of the SPU+SPUM-2 sample. (mp4)

**Movie S2.** The self-healing experiment of the SPUM-2 sample under 60°C water for 1h. (mp4)

**Movie S3.** Rapid recovery ability of SPUM-2 samples. (mp4)
